# Supplementary material for: Genetic variability of microRNA regulome in human
Source: PubMed Central journal article supplement (PMC4299713; doi:10.1002/mgg3.110), 2014-09-15

## A DROSHA

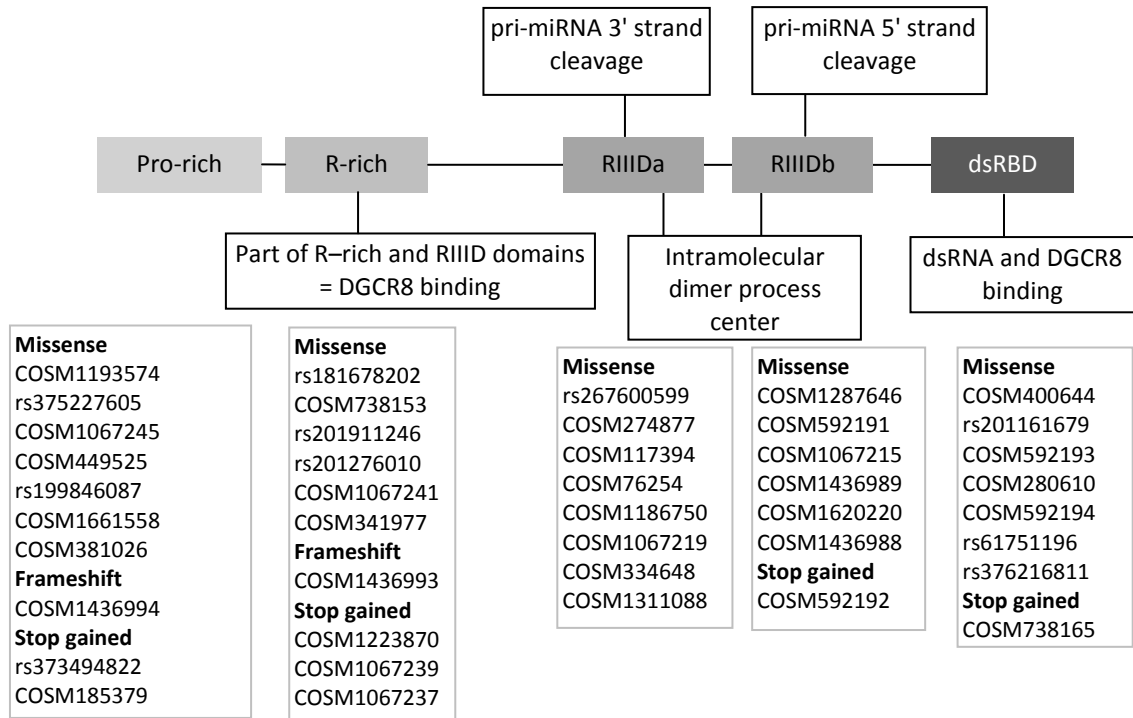

## B DGCR8

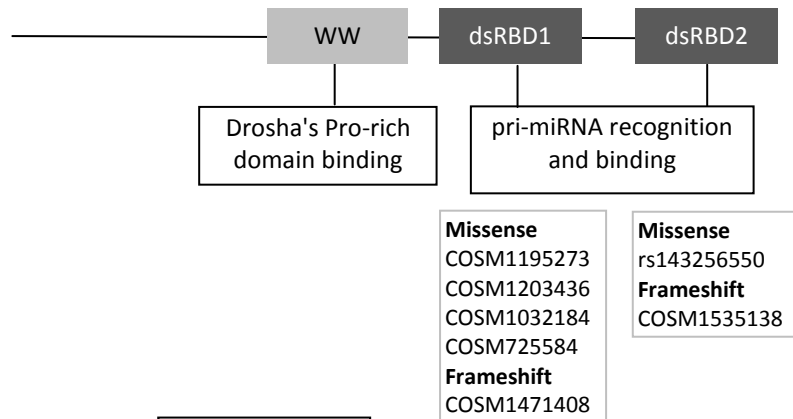

Domain of unknown function

## C DICER

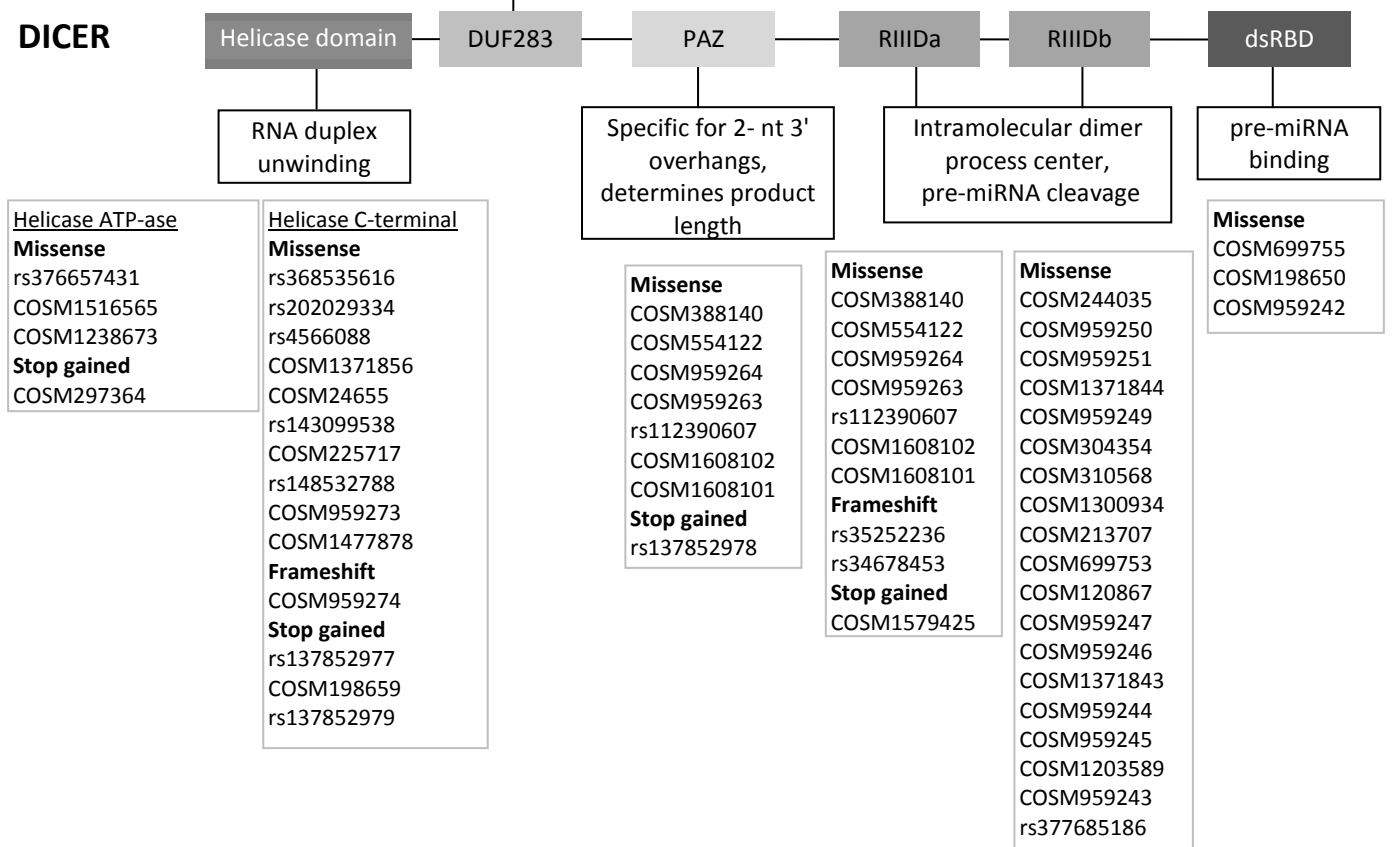

Supplement: mgg30003-0030-sd1.pdf [file mgg30003-0030-sd1.pdf]
